1 ***ALTERED MERISTEM PROGRAM1* regulates leaf identity independent of miR156-**  
2 **mediated translational repression**

3

4 **Running title: *AMP1* and vegetative phase change**

5

6 Jim P. Fouracre, Victoria J. Chen and R. Scott Poethig\*

7

8 Biology Department, University of Pennsylvania, 433 S. University Ave, Philadelphia,  
9 Pennsylvania, 19104, USA

10

11 Corresponding author: Poethig, R. S. ([spoethig@sas.upenn.edu](mailto:spoethig@sas.upenn.edu))

12

13

14 **Keywords**

15 Vegetative phase change, shoot apical meristem, miR156, *SPL*, *AMP1*, translational  
16 repression

17

18

19 **Summary statement**

20 We show that loss of the carboxypeptidase, *AMP1*, does not interfere with the function  
21 of miR156 or miR159, suggesting that *AMP1* is not universally required for miRNA-  
22 mediated translational repression in *Arabidopsis*.

23

24 **Abstract**

25 In *Arabidopsis*, loss of the carboxypeptidase, ALTERED MERISTEM PROGRAM1  
26 (AMP1), produces an increase in the rate of leaf initiation, an enlarged shoot apical  
27 meristem and an increase in the number of juvenile leaves. This phenotype is also  
28 observed in plants with reduced levels of miR156-targeted *SQUAMOSA PROMOTER*  
29 *BINDING PROTEIN-LIKE* (*SPL*) transcription factors, suggesting that AMP1 may  
30 promote *SPL* activity. However, we found that the *amp1* phenotype is only partially  
31 corrected by elevated *SPL* gene expression, and that *amp1* has no significant effect on  
32 *SPL* transcript levels, or on the level or the activity of miR156. Although evidence from  
33 a previous study suggests that AMP1 promotes miRNA-mediated translational  
34 repression, *amp1* did not prevent the translational repression of the miR156 target,  
35 *SPL9*, or the miR159 target, *MYB33*. These results suggest that *AMP1* regulates  
36 vegetative phase change downstream of, or in parallel to, the miR156/*SPL* pathway and  
37 that it is not universally required for miRNA-mediated translational repression.

38

39

40

41

42

43

## 44 INTRODUCTION

45 Plant life-histories are underpinned by a series of developmental transitions, the correct  
46 timing of which are crucial to plant survival and reproductive success (Huijser and  
47 Schmid, 2011). Vegetative phase change describes the switch between the juvenile and  
48 adult stages of vegetative growth. Depending on the species, this transition can lead to  
49 shifts in a wide variety traits (Poethig, 2013). In the model plant, *Arabidopsis thaliana*,  
50 the juvenile vegetative phase is associated with small, round leaves that lack both  
51 trichomes on the abaxial leaf surface and serrations, whereas the adult phase is  
52 characterized by larger, elongated and serrated leaves that produce abaxial trichomes.

53 The core genetic network that controls the timing of vegetative phase change has  
54 been well described. The microRNA miR156, and its sister miR157, function as master  
55 regulators of the juvenile phase. A temporal decline in miR156/miR157 during shoot  
56 development leads to an increase in expression of their target genes—*SQUAMOSA*  
57 *PROMOTER BINDING PROTEIN-LIKE* (*SPL*) transcription factors—which promote the  
58 adult phase (Wu and Poethig, 2006; Wu et al., 2009). This temporal mechanism is  
59 widely conserved and regulates shoot identity in diverse plant lineages (Chuck et al.,  
60 2007; Leichty and Poethig, 2019; Riese et al., 2008; Wang et al., 2011). *SPL* genes are  
61 known to promote the expression of miR172, which initiates adult development through  
62 repression of its targets in the *APETALA2-LIKE* (*AP2-LIKE*) gene family. Vegetative  
63 phase change is thus promoted by inverse gradients of expression of two miRNAs,  
64 miR156 and miR172 (Wu et al., 2009).

65 *ALTERED MERISTEM PROGRAM1* (*AMP1*), which encodes a putative  
66 carboxypeptidase (Helliwell et al., 2001), was identified in a genetic screen for phase

67 change mutations over 20 years ago (Conway and Poethig, 1997), but the basis for its  
68 effect on this process is still unknown. Mutations in *AMP1* produce a large number of  
69 small, round leaves that lack abaxial trichomes (juvenile leaves) and have a higher rate  
70 of leaf initiation (Telfer et al., 1997). An initial study suggested that this phenotype was  
71 not associated with a change in the timing of vegetative phase change, leading to the  
72 conclusion that the timing of vegetative phase change is regulated independently of  
73 leaf number (Telfer et al., 1997). However, this result conflicts with more recent studies  
74 showing that pre-existing leaves promote vegetative phase change (Yang et al., 2011;  
75 Yang et al., 2013; Yu et al., 2013). The phenotype of *amp1* is also surprising given the  
76 evidence that *AMP1* is required for miRNA-mediated translational repression (Li et al.,  
77 2013). miR156 promotes juvenile development by translationally repressing its targets  
78 (He et al., 2018). If *AMP1* is required for miRNA-mediated translational repression,  
79 *amp1* mutants would therefore be expected to have to a reduced number of juvenile  
80 leaves due to elevated *SPL* gene expression, which is the exact opposite of the *amp1*  
81 phenotype.

82 To resolve these issues, we investigated the interaction between *AMP1* and the  
83 miR156-*SPL* module. Our results indicate that *AMP1* promotes adult leaf traits in  
84 parallel to, or downstream of, the miR156-*SPL* module. We also found no evidence that  
85 *AMP1* is required for translational repression by either miR156 or miR159. This latter  
86 result suggests that the mechanism by which miRNAs repress translation in plants is  
87 different for different transcripts.

88

89 **RESULTS AND DISCUSSION**

90 **Elevated SPL activity has a modest effect on the *amp1* phenotype**

91 *amp1-1* (hereafter, *amp1*) mutants resemble plants with reduced *SPL* gene expression  
92 in having an increased rate of leaf initiation, an increased number of rosette leaves, an  
93 enlarged shoot apical meristem, and small, round rosette leaves that lack abaxial  
94 trichomes (Fig. 1A-F) (Chaudhury et al., 1993; Huang et al., 2015; Telfer et al., 1997;  
95 Yang et al., 2018). To determine if this phenotype is attributable to a reduction in *SPL*  
96 activity, we introduced *35S::MIM156* — which de-represses *SPL* gene expression  
97 (Franco-Zorrilla et al., 2007) — into *amp1*. *35S::MIM156* plants have a relatively slow  
98 rate of leaf initiation, have enlarged and somewhat elongated rosette leaves, produce  
99 abaxial trichomes unusually early in shoot development, and have a relatively small  
100 SAM (Fig. 1A-F). *amp1; 35S::MIM156* plants had a vegetative phenotype intermediate  
101 between that of the two parental genotypes, but which was more similar to *amp1* than to  
102 *35S::MIM156*. The rosette leaves of *amp1; 35S::MIM156* were approximately the same  
103 size as *amp1* leaves, but were similar in shape to *35S::MIM156* (Fig. 1A, B). *amp1*  
104 plants rarely produced rosette leaves with abaxial trichomes (although abaxial trichome  
105 production on cauline leaves was unaffected (Fig. S1)), whereas about 25% of *amp1*;  
106 *35S::MIM156* produced rosette leaves with abaxial trichomes late in shoot development.  
107 In contrast, all *35S::MIM156* plants produced rosette leaves with abaxial trichomes by  
108 plastochron 3 (Fig. 1C). Similarly, the rate of leaf initiation in *amp1; 35S::MIM156* was  
109 intermediate between that of *amp1* and *35S::MIM156*, but was closer to that of *amp1*  
110 than *35S::MIM156* (Fig. 1D). The number of rosette leaves in *amp1; 35S::MIM156* was  
111 also intermediate between these two genotypes, but was more similar to *amp1* than  
112 *35S::MIM156* (Fig. 1E). Finally, the SAM of *amp1; 35S::MIM156* was more similar in

113 size to *amp1* than to *35S::MIM156* (Fig. 1F). These results suggest that the phenotype  
114 of *amp1* is not a consequence of repressed SPL activity, implying that *AMP1* acts either  
115 downstream or in parallel to the miR156/*SPL* module. This conclusion is consistent with  
116 the observation that vegetative development (Fig. 1C) and flowering time (Fig. 1G) are  
117 dissociated in *amp1*.

118

119 **The phenotype of *amp1* is not attributable to a change in miR156/miR157 or *SPL***  
120 **gene expression**

121 To explore the relationship between *AMP1* and the miR156/*SPL* module in more detail,  
122 we examined the effect of *amp1* on the abundance of the miR156 and *SPL* transcripts.

123 qRT-PCR analysis of the shoot apices of plants grown in short days (SD) showed that

124 *amp1* had no significant effect on the level of miR156 or miR157 (Fig. 2A), or the

125 transcripts of three direct targets of these miRNAs: *SPL3*, *SPL9* and *SPL13* (Fig. 2B).

126 To test whether *amp1* affects *SPL* expression independent of miR156/miR157, we

127 measured the transcripts of these genes in *35S::MIM156* and *amp1; 35S::MIM156*

128 plants. As expected (He et al., 2018), all three *SPL* transcripts were significantly

129 elevated in *35S::MIM156*. All three transcripts were elevated to a much smaller extent in

130 *amp1; 35S::MIM156* (Fig. 2B). Together, these results suggest that *AMP1* may promote

131 *SPL* expression, but only in the absence of miR156/miR157.

132 We then examined the expression of these genes in successive rosette leaf

133 primordia (LP) of plants grown in SD. Because *amp1* initiates leaves more rapidly than

134 WT, LP were grouped according to the time of harvest rather than position on the shoot.

135 Both the level and rate of decline of miR156 were almost identical in WT and *amp1* (Fig.

136 2C). miR157 was elevated in all LP, but declined at approximately the same rate as in  
137 WT plants. *SPL9* and *SPL13* transcripts were also elevated in the LP of *amp1* relative to  
138 WT (Fig. 2D), but these differences were relatively modest (two-fold or less) and not  
139 statistically significant. Furthermore, the elevated expression of *SPL9* and *SPL13* is  
140 inconsistent with the elevated level of miR157 and with the juvenilized phenotype of  
141 *amp1*. Taken together, these data suggest that the vegetative phenotype of *amp1* is not  
142 caused by increased expression of miR156/miR157 or decreased expression of *SPL*  
143 genes. It is possible that *AMP1* regulates *SPL* expression independently of miR156  
144 (Fig. 2B). However, the observation that *amp1* does not have a significant effect on  
145 *SPL9* and *SPL13* expression at 20 DAP (Fig. 2D), when the levels of miR156 and  
146 miR157 are very low (Fig. 2C), suggests that this is unlikely.

147         If *AMP1* does not regulate miR156 or *SPL* gene expression, perhaps it regulates  
148 shared downstream targets. Consistent with this hypothesis, expression of the closely-  
149 related *AP2-like* transcription factors *TOE1* and *TOE2* (which are targets of the *SPL*-  
150 regulated miRNA, miR172) was consistently elevated in *amp1* (Fig. 2E). This effect is  
151 not attributable to a change in the level of miR172, however, as the abundance of this  
152 miRNA was not reduced in *amp1* (Fig. 2C). *TOE1* blocks the production of trichomes on  
153 the abaxial side of the leaf by working in association with the abaxial specification  
154 gene *KANAD1* (*KAN1*) to repress the transcription of *GLABRA1* (*GL1*) (Wang et al.,  
155 2019; Xu et al., 2019). In WT plants, *GL1* expression increased dramatically between  
156 13-14 DAP and 20 DAP, consistent with the increase in trichome production over this  
157 period. *GL1* displayed a similar temporal pattern in *amp1*, but was almost completely  
158 suppressed in the earliest LP and was considerably lower than WT in LP harvested at

159 20 DAP (Fig. 2F). In contrast, the expression of *TRANSPARENT TESTA GLABRA1*  
160 (*TTG1*) — which promotes trichome initiation via a distinct protein complex to *GL1*  
161 (Pesch et al., 2015) — was not reduced in *amp1* (Fig. 2G). These results suggest that  
162 *AMP1* promotes abaxial trichome formation via *GL1*, not *TTG1*, and that it acts as a  
163 general activator of *GL1* expression, rather than a temporal regulator. They also support  
164 the conclusion that *AMP1* regulates abaxial trichome production downstream of  
165 miR156/*SPL*.

166

167 **The timing of vegetative phase change is regulated independently of leaf**  
168 **initiation in *amp1***

169 The juvenilized phenotype of *amp1* was originally attributed to the increased rate of leaf  
170 initiation in this mutant (Telfer et al., 1997). However, this interpretation is inconsistent  
171 with more recent studies showing that pre-existing leaves promote the transition to the  
172 adult vegetative phase by repressing miR156 (Yang et al., 2011; Yang et al., 2013; Yu  
173 et al., 2013). To determine the basis of this discrepancy, we characterized the effect of  
174 *CLAVATA3* (*CLV3*) and *CLV1* mutations on vegetative phase change. We chose these  
175 mutations because they resemble *amp1* in having an enlarged SAM and an accelerated  
176 rate of leaf initiation (Clark et al., 1995; Leyser and Furrer, 1992).

177 Like *amp1* (Telfer et al., 1997), *clv3* and *clv1* produced smaller, rounder rosette  
178 leaves, and more leaves without abaxial trichomes (Fig. 3A - C). This increase in the  
179 number of juvenile-like leaves was not associated with a delay in the juvenile-to-adult  
180 transition, however. Instead, *clv3* mutants produced leaves with abaxial trichomes one  
181 day earlier than WT plants (Fig. 3D). To determine if the phenotype of *clv1* and *clv3* is



182 dependent on miR156, we introduced the miR156 sponge, *35S::MIM156*, into these  
183 mutants. This transgene was epistatic to *clv1* and *clv3* with respect to their effect on leaf  
184 shape (Fig. 3A, B) and abaxial trichome production (Fig. 3C), suggesting that their effect  
185 on these traits requires miR156.

186 We then examined the effect of *clv3* and *clv1* on the expression of miR156 and  
187 its targets, *SPL9* and *SPL13*, in shoot apices (Fig. 3E) and LP (Fig. 3F). qRT-PCR  
188 revealed that *clv1* and *clv3* have slightly reduced levels of miR156, although this  
189 difference was only statistically significant in *clv3*. Consistent with the decreased  
190 amount of miR156, *SPL9* and *SPL13* transcripts were slightly elevated in both the  
191 mutants, although again this difference was only statistically significant in a few cases.  
192 If these relatively small differences in miR156 and *SPL* gene expression are functionally  
193 significant, they would be expected to promote the appearance of adult traits, not  
194 repress the expression of these traits as is the case in *clv1* and *clv3*. To explore this  
195 inconsistency, we examined the effect of *clv3* on the expression of a miR156-sensitive  
196 and a miR156-resistant version of the *SPL9::SPL9-GUS* reporter (Xu et al., 2016).  
197 There was no obvious difference in the expression of these reporters in the presence or  
198 absence of *clv3* (Fig. 3G), supporting the conclusion that the effect of *clv3* on leaf  
199 identity is not attributable to a change in the level of miR156 or its targets.

200 Instead, the effect of *clv3* and *clv1* on leaf identity is primarily attributable to their  
201 effect on the rate of leaf initiation. Specifically, *clv3* and *clv1* appear to increase the  
202 number of juvenile leaves by accelerating the rate of leaf production during the period  
203 when miR156 levels are high. This conclusion is supported by the observation  
204 that *35S::MIM156* is epistatic to these mutations with respect to their effect on leaf

205 identity (Fig. 3A, B); i.e. miR156 is required for their leaf identity phenotypes. Consistent  
206 with the evidence that leaves promote the juvenile-to-adult transition by repressing  
207 miR156 (Yang et al., 2011; Yang et al., 2013; Yu et al., 2013), *clv3* and *clv1* have  
208 slightly reduced levels of miR156 and slightly elevated levels of *SPL9* and *SPL13* (Fig.  
209 3E, F). However, this relatively small effect is apparently insufficient to interfere with the  
210 function of these genes in specifying juvenile leaf identity.

211         The increased number of juvenile leaves in *amp1* is also partly attributable to its  
212 higher rate of leaf initiation (Telfer et al., 1997). However, *amp1* differs  
213 from *clv3* and *clv1* in having a much more significant effect on leaf identity: *amp1* rarely  
214 produces abaxial trichomes on rosette leaves, whereas *clv3* and *clv1* routinely do so. In  
215 addition, the phenotype of *amp1* is less sensitive to a reduction in miR156 than the  
216 phenotype of *clv3* and *clv1*; in general, *amp1*, *35S::MIM156* plants more closely  
217 resembled *amp1* than *35S::MIM156* (Fig. 1A-E). This observation, and the effect  
218 of *amp1* on the expression of genes involved in abaxial trichome production (Fig. 2E, F),  
219 suggest that AMP1 operates independently of miR156 to regulate genes involved in leaf  
220 identity. A direct effect of AMP1 on leaf identity genes would explain why *amp1* has a  
221 more severe vegetative phenotype than *clv3* and *clv1*, and why the phenotype  
222 of *amp1* is relatively insensitive to changes in the level of miR156.

223

#### 224 **AMP1 is not universally required for translational repression**

225 Given the role of *AMP1* in translational repression (Li et al., 2013), it is possible that the  
226 abundance of *SPL* transcripts in *amp1* (Fig. 2B, D) does not accurately reflect their  
227 biological activity. To determine whether AMP1 is required for the post-transcriptional

228 regulation of *SPL* genes, we first measured the amount of *SPL9* and *SPL13* transcript  
229 cleavage in WT and *amp1* plants. Consistent with a previous study on miR156-  
230 mediated cleavage (He et al., 2018), the rate of transcript cleavage for both *SPL9* and  
231 *SPL13* declined during vegetative development in WT plants (Fig. 4A). This happened  
232 at a slower rate in *amp1*, presumably in part due to the higher level of miR156 in the  
233 *amp1* 13-14 DAP sample compared to WT (Fig. 2C) and the threshold-dependence of  
234 miR156 activity (He et al., 2018). However, later in development, transcript cleavage in  
235 *amp1* was similar to WT (Fig. 4A). This demonstrates that miR156 is functional in *amp1*  
236 and confirms the observation that AMP1 is not required for transcriptional cleavage (Li  
237 et al., 2013).

238         Although miR156 induces transcript cleavage, it represses the expression of its  
239 targets primarily by promoting translational repression (He et al., 2018). To examine the  
240 effect of *amp1* on this process, we crossed miR156-sensitive (sSPL9) and miR156-  
241 resistant (rSPL9) GUS-reporter constructs of *SPL9* into *amp1*. There was no obvious  
242 difference in the staining intensity of these reporter proteins in WT and *amp1* (Fig. 4B).  
243 To confirm this impression, we measured the staining intensity of the sSPL9-GUS  
244 reporter spectrophotometrically in leaf primordia of WT and *amp1* harvested at a stage  
245 when transcript cleavage was nearly equivalent in these genotypes (20 DAP (Fig. 4A)).  
246 There was no significant difference in sSPL9 protein levels in these genotypes (Fig. 4C,  
247 D). These results indicate that *amp1* has no effect on the activity of miR156, implying  
248 that translational repression of *SPL9* occurs normally in *amp1*. To determine if miR156  
249 is uniquely insensitive to *amp1*, we examined the effect of *amp1* on the expression of  
250 MYB33, a transcription factor that also regulates shoot identity (Guo et al., 2017) and is

251 translationally repressed by miR159 (Li et al., 2014). miR159-sensitive and miR159-  
252 resistant versions of MYB33-GUS (Millar and Gubler, 2005) were crossed into *amp1*,  
253 and WT and *amp1* plants were stained for GUS activity one week after germination, and  
254 at flowering. MYB33-GUS was repressed in a miR159-dependent fashion in leaves and  
255 floral organs of WT plants, and *amp1* had no obvious effect on this expression pattern  
256 (Fig. 4E, F). Because *amp1* had no effect on the expression of sMYB33-GUS, it is  
257 reasonable to assume that miR159-dependent translational repression occurs normally  
258 in this mutant. We conclude from these results that *AMP1* is not universally required for  
259 the translational repression of miRNA-targets.

260         Whether or not *AMP1* functions in translational repression may be a result of the  
261 sub-cellular localization of the process. AMP1 has been shown to colocalize with the  
262 key silencing component ARGONAUTE1 (AGO1) on the endoplasmic reticulum (ER)  
263 (Li et al., 2013). However, AGO1 also localizes to processing bodies (p-bodies),  
264 cytoplasmic foci of mRNA-ribonucleoprotein complexes that facilitate the sequestration  
265 of mRNAs for translational silencing (reviewed in Chantarachot and Bailey-Serres,  
266 2018). Loss of the p-body protein SUO leads to a reduction in the translational  
267 repression of the miR156-target *SPL3* (Yang et al., 2012), suggesting that p-bodies are  
268 also important sites of miRNA-mediated translational repression. Taken together, these  
269 results are consistent with a model in which a) miRNA-mediated translational repression  
270 occurs in distinct sub-cellular compartments in a sequence-specific manner and b)  
271 unique sets of proteins contribute to this repression, depending on the compartment  
272 (e.g. AMP1 on the ER, SUO in p-bodies). Whether the translational repression of  
273 *MYB33* by miR159 occurs in p-bodies remains to be demonstrated.

274 Support for this model comes from the finding that the microtubule severing-  
275 enzyme KATANIN 1 is also required for translation repression (Brodersen et al., 2008).  
276 What signals the cellular machinery uses to determine where to localize miRNA-target  
277 pairs for translational repression is unclear. There appear to be no consistent  
278 differences between the miRNA hairpin secondary structures and miRNA/miRNA\*  
279 duplexes of AMP1-dependent and AMP1-independent miRNAs (Fig. S2). Although it is  
280 perhaps unlikely that any such signals would persist during miRNA processing. The  
281 strength of target complementarity is known to affect silencing efficacy (Li et al., 2014),  
282 and could also drive sub-cellular distribution, but there is also no trend in target  
283 mismatch number between the AMP1-dependent/independent classes of miRNA (Table  
284 S1). Given the overlapping expression domains of a number of these miRNAs  
285 (reviewed in Fouracre and Poethig, 2016), it is unlikely that the site of translational  
286 repression is developmentally regulated. At the cellular level, there is evidence to  
287 suggest that miRNA sequences include signals that control the specificity of inter-  
288 cellular mobility (Skopelitis et al., 2018). It will be fascinating to see if the same signaling  
289 mechanisms determine the destination of miRNAs within cells.

290

## 291 **Materials and Methods**

### 292 **Plant material and growth conditions**

293 Col was used as the genetic background for all stocks. The following genetic lines have  
294 been described previously: *amp1-1* (Chaudhury et al., 1993); *SPL9::sSPL9-GUS*,  
295 *SPL9::rSPL9-GUS* (Xu et al., 2016); *35S::MIM156* (Fouracre and Poethig, 2019); *clv1-4*  
296 (Clark et al., 1993); *MYB33::sMYB33-GUS*, *MYB33::rMYB33-GUS* (Millar and Gubler,

297 2005). *clv3-10* (CS68823) was obtained from the Arabidopsis Biological Resource  
298 Center (Ohio State University). Seeds were sown on fertilized Farfard #2 soil (Farfard)  
299 and kept at 4°C for 3 days prior to transfer to a growth chamber, with the transfer day  
300 counted as day 0 for plant age (0 DAP). Plants were grown at 22°C under a mix of both  
301 white (USHIO F32T8/741) and red-enriched (Interlectric F32/T8/WS Gro-Lite)  
302 fluorescent bulbs in either long day (16 hrs. light/8 hrs. dark; 80  $\mu\text{mol m}^{-2} \text{s}^{-1}$ ) or short  
303 day (10 hrs light/14 hrs dark; 120  $\mu\text{mol m}^{-2} \text{s}^{-1}$ ) conditions.

304

### 305 **GUS staining**

306 Plants were fixed in 90% acetone on ice for 10 minutes and washed with GUS staining  
307 buffer (5mM potassium ferricyanide and 5mM ferrocyanide in 0.1M  $\text{PO}_4$  buffer) and  
308 stained for between 8 hrs and overnight (depending on transgene strength) at 37°C in  
309 2mM X-Gluc GUS staining buffer. For the quantification of GUS staining intensity,  
310 ~1mm LP were harvested at 21 DAP, stained O/N and images of stained primordia  
311 converted from RGB color mode to hue saturation brightness mode as previously  
312 described (Béziat et al., 2017). A consistent position in the middle of the leaf lamina,  
313 adjacent to the midvein, was used for measurement.

314

### 315 **Histology**

316 Shoot apices were cleared and imaged according to a described protocol (Chou et al.,  
317 2016).

318

### 319 **RNA expression analyses**

320 Tissue (either shoot apices with leaf primordia  $\leq 1$  mm attached or isolated leaf primordia  
321 0.5-1 mm in size – as specified in the text) were ground in liquid nitrogen and total RNA  
322 extracted using Trizol (Invitrogen) as per the manufacturer’s instructions. RNA was  
323 DNase treated with RQ1 (Promega) and 250 ng-1  $\mu$ g of RNA was used for reverse  
324 transcription using Superscript III (Invitrogen). Gene specific RT primers were used to  
325 amplify miR156, miR157, miR172 and SnoR101 and a polyT primer for mRNA  
326 amplification. Three-step qPCR of cDNA was carried out using SYBR-Green Master Mix  
327 (Bimake). qPCR reactions were run in triplicate and an average taken. For analyses of  
328 *amp1* shoot apices and *clv* mutants, separate RNA extractions of three biological  
329 replicates were carried out. For analyses of *amp1* leaf primordia, three reverse-  
330 transcription replicates from single RNA extractions were carried out for each sample (at  
331 least 60 LP were pooled for each RNA extraction). 8 DAP samples were collected twice  
332 - once as part of a biological replicate with 13-13 DAP and once as part of a biological  
333 replicate with 20 DAP samples. Relative transcript levels were normalized to snoR101  
334 (for miRNAs) and *ACT2* (*amp1* shoot apices, *clv* mutants) or *UBQ10* (*amp1* leaf  
335 primordia) (for mRNAs) and expressed as a ratio of expression to WT (*amp1* shoot  
336 apices, *clv* mutants) and WT 8 DAP (*amp1* leaf primordia) samples

337 For the quantification of transcript cleavage, a modified 5’RACE protocol was  
338 followed as previously described (He et al., 2018). The data presented are the average  
339 of three ratios from separate reverse transcription replicates (six in the case of *amp1* 8  
340 DAP – three reverse transcription replicates from two biological replicates).

341 The qPCR primers used in this study are listed in Supplementary Table 2.

342

## 343 **Statistical analyses**

344 A two-tailed Student's *t*-test was used to carry out pairwise comparisons between  
345 different genotypes. For comparison of multiple samples, to decrease the chance of  
346 false positives, a one-way ANOVA followed by a Tukey test was used for multi-way  
347 comparisons. Statistical analyses were carried out in R (r-project.org) and Excel  
348 (Microsoft).

349 For figures featuring boxplots, boxes display the IQR (boxes), median (lines), and  
350 values beyond 1.5\* IQR (whiskers); mean values are marked by a solid diamond (◆).

351

352

## 353 **Acknowledgements**

354 We thank Anthony Millar (Australian National University) for the kind gift of the MYB33-  
355 GUS reporters, members of the Poethig lab for useful discussions and Melissa Morrison  
356 for assistance with collecting phenotypic data.

357

## 358 **Competing interests**

359 No competing interests declared

360

## 361 **Funding**

362 This work was supported by the National Institutes of Health grant R01-GM51893 to R.

363 S.P.

364

## 365 **References**



- 366 **Béziat, C., Kleine-Vehn, J. and Feraru, E.** (2017). Histochemical Staining of  $\beta$ -Glucuronidase  
367 and Its Spatial Quantification. In *Plant Hormones: Methods and Protocols* (ed. Kleine-  
368 Vehn, J. and Sauer, M.), pp. 73–80. New York, NY: Springer New York.
- 369 **Brodersen, P., Sakvarelidze-Achard, L., Bruun-Rasmussen, M., Dunoyer, P., Yamamoto,**  
370 **Y. Y., Sieburth, L. and Voinnet, O.** (2008). Widespread translational inhibition by plant  
371 miRNAs and siRNAs. *Science* **320**, 1185–1190.
- 372 **Chantarachot, T. and Bailey-Serres, J.** (2018). Polysomes, Stress Granules, and Processing  
373 Bodies: A Dynamic Triumvirate Controlling Cytoplasmic mRNA Fate and Function.  
374 *Plant Physiol.* **176**, 254–269.
- 375 **Chaudhury, A. M., Letham, S., Craig, S. and Dennis, E. S.** (1993). *amp1* - a mutant with high  
376 cytokinin levels and altered embryonic pattern, faster vegetative growth, constitutive  
377 photomorphogenesis and precocious flowering. *The Plant Journal* **4**, 907–916.
- 378 **Chou, H., Wang, H. and Berkowitz, G. A.** (2016). Shoot apical meristem size measurement.  
379 *Bio-protocol* **6**, e2055.
- 380 **Chuck, G., Cigan, A. M., Saeteurn, K. and Hake, S.** (2007). The heterochronic maize mutant  
381 *Corngrass1* results from overexpression of a tandem microRNA. *Nat Genet* **39**, 544–549.
- 382 **Clark, S. E., Running, M. P. and Meyerowitz, E. M.** (1993). *CLAVATA1*, a regulator of  
383 meristem and flower development in *Arabidopsis*. *Development* **119**, 397–418.
- 384 **Clark, S. E., Running, M. P. and Meyerowitz, E. M.** (1995). *CLAVATA3* is a specific regulator  
385 of shoot and floral meristem development affecting the same processes as *CLAVATA1*.  
386 *Development* **121**, 2057–2067.
- 387 **Conway, L. J. and Poethig, R. S.** (1997). Mutations of *Arabidopsis thaliana* that transform  
388 leaves into cotyledons. *Proc Natl Acad Sci USA* **94**, 10209–10214.
- 389 **Fouracre, J. P. and Poethig, R. S.** (2016). The role of small RNAs in vegetative shoot  
390 development. *Curr Opin Plant Biol* **29**, 64–72.
- 391 **Fouracre, J. P. and Poethig, R. S.** (2019). Role for the shoot apical meristem in the  
392 specification of juvenile leaf identity in *Arabidopsis*. *Proc Natl Acad Sci USA* **116**,  
393 10168.
- 394 **Franco-Zorrilla, J. M., Valli, A., Todesco, M., Mateos, I., Puga, M. I., Rubio-Somoza, I.,**  
395 **Leyva, A., Weigel, D., Garcia, J. A. and Paz-Ares, J.** (2007). Target mimicry provides  
396 a new mechanism for regulation of microRNA activity. *Nat Genet* **39**, 1033–7.
- 397 **Guo, C., Xu, Y., Shi, M., Lai, Y., Wu, X., Wang, H., Zhu, Z., Poethig, R. S. and Wu, G.**  
398 (2017). Repression of miR156 by miR159 regulates the timing of the juvenile-to-adult  
399 transition in *Arabidopsis*. *Plant Cell* **29**, 1293–1304.

- 400 **He, J., Xu, M., Willmann, M. R., McCormick, K., Hu, T., Yang, L., Starker, C. G., Voytas,**  
401 **D. F., Meyers, B. C. and Poethig, R. S. (2018).** Threshold-dependent repression of *SPL*  
402 gene expression by miR156/miR157 controls vegetative phase change in *Arabidopsis*  
403 *thaliana*. *PLoS Genet.* **14**, e1007337.
- 404 **Helliwell, C. A., Chin-Atkins, A. N., Wilson, I. W., Chapple, R., Dennis, E. S. and**  
405 **Chaudhury, A. (2001).** The *Arabidopsis* *AMP1* gene encodes a putative glutamate  
406 carboxypeptidase. *Plant Cell* **13**, 2115–2125.
- 407 **Huang, W., Pitorre, D., Poretska, O., Marizzi, C., Winter, N., Poppenberger, B. and**  
408 **Sieberer, T. (2015).** *ALTERED MERISTEM PROGRAM1* Suppresses Ectopic Stem Cell  
409 Niche Formation in the Shoot Apical Meristem in a Largely Cytokinin-Independent  
410 Manner. *Plant Physiol* **167**, 1471–1486.
- 411 **Huijser, P. and Schmid, M. (2011).** The control of developmental phase transitions in plants.  
412 *Development* **138**, 4117–4129.
- 413 **Leichty, A. R. and Poethig, R. S. (2019).** Development and evolution of age-dependent  
414 defenses in ant-acacias. *Proc Natl Acad Sci USA* **116**, 15596.
- 415 **Leyser, H. M. O. and Furner, I. J. (1992).** Characterization of three shoot apical meristem  
416 mutants of *Arabidopsis thaliana*. *Development* **116**, 397–403.
- 417 **Li, S., Liu, L., Zhuang, X., Yu, Y., Liu, X., Cui, X., Ji, L., Pan, Z., Cao, X., Mo, B., et al.**  
418 (2013). MicroRNAs inhibit the translation of target mRNAs on the endoplasmic  
419 reticulum in *Arabidopsis*. *Cell* **153**, 562–74.
- 420 **Li, J., Reichel, M. and Millar, A. A. (2014).** Determinants beyond both complementarity and  
421 cleavage govern microR159 efficacy in *Arabidopsis*. *PLoS Genet* **10**, e1004232.
- 422 **Millar, A. A. and Gubler, F. (2005).** The *Arabidopsis* GAMYB-like genes, *MYB33* and  
423 *MYB65*, are microRNA-regulated genes that redundantly facilitate anther development.  
424 *Plant Cell* **17**, 705–21.
- 425 **Pesch, M., Schultheiß, I., Klopffleisch, K., Uhrig, J. F., Koegl, M., Clemen, C. S., Simon, R.,**  
426 **Weidtkamp-Peters, S. and Hülskamp, M. (2015).** TRANSPARENT TESTA  
427 GLABRA1 and GLABRA1 Compete for Binding to GLABRA3 in *Arabidopsis*. *Plant*  
428 *Physiol.* **168**, 584–597.
- 429 **Poethig, R. S. (2013).** Vegetative phase change and shoot maturation in plants. *Curr. Top. Dev.*  
430 *Biol.* **105**, 125–52.
- 431 **Riese, M., Zobell, O., Saedler, H. and Huijser, P. (2008).** SBP-domain transcription factors as  
432 possible effectors of cryptochrome-mediated blue light signalling in the moss  
433 *Physcomitrella patens*. *Planta* **227**, 505–15.

- 434 **Skopelitis, D. S., Hill, K., Klesen, S., Marco, C. F., von Born, P., Chitwood, D. H. and**  
435 **Timmermans, M. C. P.** (2018). Gating of miRNA movement at defined cell-cell  
436 interfaces governs their impact as positional signals. *Nat. Commun.* **9**, 3107.
- 437 **Telfer, A., Bollman, K. M. and Poethig, R. S.** (1997). Phase change and the regulation of  
438 trichome distribution in *Arabidopsis thaliana*. *Development* **124**, 645–654.
- 439 **Wang, J. W., Park, M. Y., Wang, L. J., Koo, Y., Chen, X. Y., Weigel, D. and Poethig, R. S.**  
440 (2011). miRNA control of vegetative phase change in trees. *PLoS Genet* **7**, e1002012.
- 441 **Wang, L., Zhou, C.-M., Mai, Y.-X., Li, L.-Z., Gao, J., Shang, G.-D., Lian, H., Han, L.,**  
442 **Zhang, T.-Q., Tang, H.-B., et al.** (2019). A spatiotemporally regulated transcriptional  
443 complex underlies heteroblastic development of leaf hairs in *Arabidopsis thaliana*. *The*  
444 *EMBO Journal* **38**, e100063.
- 445 **Wu, G. and Poethig, R. S.** (2006). Temporal regulation of shoot development in *Arabidopsis*  
446 *thaliana* by miR156 and its target *SPL3*. *Development* **133**, 3539–47.
- 447 **Wu, G., Park, M. Y., Conway, S. R., Wang, J. W., Weigel, D. and Poethig, R. S.** (2009). The  
448 sequential action of miR156 and miR172 regulates developmental timing in *Arabidopsis*.  
449 *Cell* **138**, 750–9.
- 450 **Xu, M., Hu, T., Zhao, J., Park, M. Y., Earley, K. W., Wu, G., Yang, L. and Poethig, R. S.**  
451 (2016). Developmental functions of miR156-regulated *SQUAMOSA PROMOTER*  
452 *BINDING PROTEIN-LIKE (SPL)* genes in *Arabidopsis thaliana*. *PLoS Genet.* **12**,  
453 e1006263.
- 454 **Xu, Y., Qian, Z., Zhou, B. and Wu, G.** (2019). Age-dependent heteroblastic development of  
455 leaf hairs in *Arabidopsis*. *New Phytologist* **224**, 741–748.
- 456 **Yang, L., Conway, S. R. and Poethig, R. S.** (2011). Vegetative phase change is mediated by a  
457 leaf-derived signal that represses the transcription of miR156. *Development* **138**, 245–9.
- 458 **Yang, L., Wu, G. and Poethig, R. S.** (2012). Mutations in the GW-repeat protein SUO reveal a  
459 developmental function for microRNA-mediated translational repression in *Arabidopsis*.  
460 *Proc Natl Acad Sci USA* **109**, 315–320.
- 461 **Yang, L., Xu, M., Koo, Y., He, J. and Poethig, R. S.** (2013). Sugar promotes vegetative phase  
462 change in *Arabidopsis thaliana* by repressing the expression of *MIR156A* and *MIR156C*.  
463 *Elife* **2**, e00260.
- 464 **Yang, S., Poretska, O. and Sieberer, T.** (2018). ALTERED MERISTEM PROGRAM1  
465 Restricts Shoot Meristem Proliferation and Regeneration by Limiting HD-ZIP III-  
466 Mediated Expression of RAP2.6L. *Plant Physiol.* **177**, 1580–1594.
- 467 **Yu, S., Cao, L., Zhou, C. M., Zhang, T. Q., Lian, H., Sun, Y., Wu, J. Q., Huang, J. R.,**  
468 **Wang, G. D. and Wang, J. W.** (2013). Sugar is an endogenous cue for juvenile-to-adult  
469 phase transition in plants. *Elife* **2**, e00269.

470

## 471 **Figure Legends**

### 472 **Fig. 1. Elevated *SPL* gene activity only partially suppresses the *amp1* phenotype.**

473 (A) Photographs of plants taken at 16 DAP, scale bar: 5mm. (B) Silhouettes of  
474 heteroblastic series of rosette leaves for lines shown in (A). (C) Percentage of individual  
475 plants that produced at least one rosette leaf with abaxial trichomes ( $n \geq 18$ ). (D) Leaf  
476 emergence was scored when leaves became visible without manipulation of the rosette,  
477 error bars represent the SEM ( $n \geq 18$ ). (E, F, G) Statistically distinct genotypes were  
478 identified by one-way ANOVA with *post hoc* Tukey multiple comparison test (letters  
479 indicate statistically distinct groups;  $p < 0.05$ ; sample sizes are shown in the figure).  
480 Images and measurements in (F) are of SAMs of plants harvested at 5 DAP captured  
481 using DIC microscopy, scale bar: 100 $\mu$ M. All phenotypic analyses were carried out in  
482 LD conditions.

### 483 **Fig. 2. The *amp1* phenotype is not associated with repressed *SPL* activity.** qRT-

484 PCR analyses of gene expression. (A, B) Shoot apices with leaf primordia  $\geq 1$ mm  
485 removed at 8 DAP. (C - G) Isolated leaf primordia (LP) 0.5-1mm in size. 8 DAP = LP1-2;  
486 13-14 DAP = LP 4-5 (*amp1* LP were harvested at 13 DAP, WT LP at 14 DAP); 20 DAP  
487 = WT LP9-10, *amp1* LP14-16. Error bars represent the SEM. All plants were grown in  
488 SD conditions. Asterisks represent significant differences between genotypes calculated  
489 by two-tailed *t*-test ( $p < 0.05 = *$ ;  $p < 0.01 = **$ ;  $p < 0.001 = ***$ ).

### 490 **Fig. 3. Enhanced *clv* juvenility is a consequence of an increased rate of leaf**

491 **initiation, rather than repressed *SPL* gene activity.** (A) Photographs were taken at

492 21 DAP, scale bar: 5mm. (B) Silhouettes of heteroblastic series of rosette leaves for  
493 lines shown in (A). (C) Statistically distinct genotypes were identified by one-way  
494 ANOVA with *post hoc* Tukey multiple comparison test (letters indicate statistically  
495 distinct groups;  $p < 0.05$ ; sample sizes are shown in the figure). (D) Leaf emergence  
496 was scored when leaves became visible without manipulation of the rosette, the dashed  
497 line indicates the first leaf to produce abaxial trichomes, error bars represent the SEM ( $n$   
498  $\geq 23$ ). (E, F) qRT-PCR analyses of gene expression of (E) shoot apices with leaf  
499 primordia  $\geq 1$ mm removed at 10 DAP and (F) isolated LP1&2 0.5-1mm in size. Asterisks  
500 represent significant differences between WT vs *clv3* or WT vs *clv1*. Significance was  
501 calculated by two-tailed *t*-test ( $p < 0.05$ ). (G) GUS staining of miR156-sensitive and  
502 miR156-resistant SPL-GUS reporter constructs at 14 DAP. Phenotypic analyses were  
503 carried out in LD conditions (A-D), gene expression analyses were carried out in SD  
504 conditions (E-G).

505 **Fig. 4. miRNA-regulated SPL9 and MYB33 proteins accumulate normally in *amp1*.**

506 (A) The relative abundance of uncleaved/cleaved transcripts, normalized to WT 8 DAP.  
507 See Fig. 2B legend for details of samples. (B) GUS staining of miR156-sensitive and  
508 miR156-resistant SPL-GUS reporter constructs at 21 DAP. (C, D) Quantification of  
509 sSPL9-GUS protein levels by image analysis. RGB color mode ((C), top panels), hue  
510 saturation brightness mode ((C), bottom panels). Red squares indicate where signal  
511 intensity was measured, each dot represents an individual primordia (D). (E, F) GUS  
512 staining of miR159-sensitive and miR159-resistant MYB33-GUS reporter constructs in 7  
513 DAP seedlings (E) and flowers (F). Scale bars: (B) 5mm, (C) 200 $\mu$ M, (E, F) 1mm.

514

515 **Supplementary Fig. 1. *amp1* cauline leaves produce abaxial trichomes.** Scale bar:

516 2mm

517 **Supplementary Fig. 2 Predicted hairpin structures for miRNAs that are *AMP1*-**

518 **dependent and independent for translational repression. *AMP1*-independent (this**

519 study) – miR156, miR157, miR159; *AMP1*-dependent (Li et al., 2013) – miR164,

520 miR165, miR166 and miR398. Representative functional members of miRNA families

521 are displayed. Stem-loop sequences were downloaded from miRBase

522 ([www.mirbase.org](http://www.mirbase.org)) and hairpin structures predicted using the default settings on

523 RNAfold (<http://rna.tbi.univie.ac.at/>). Minimum free-energy models of hairpins are

524 shown, color coded for base pair probability. Black lines are drawn alongside mature

525 miRNA sequences.

526

527

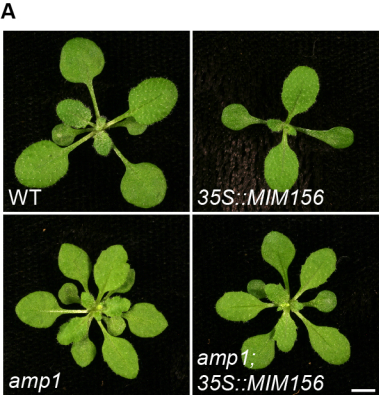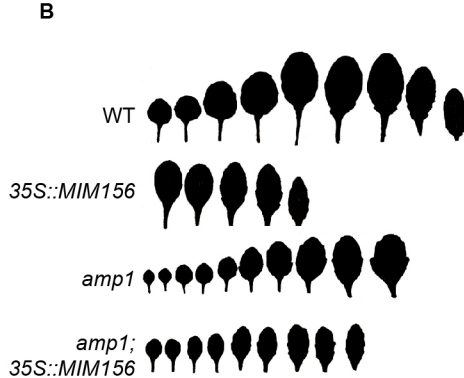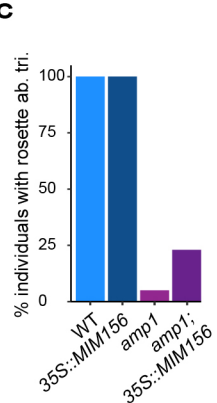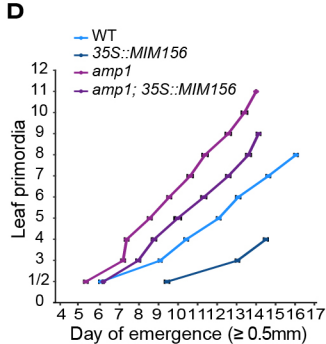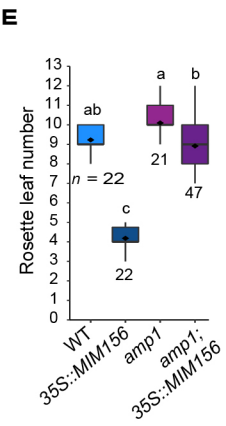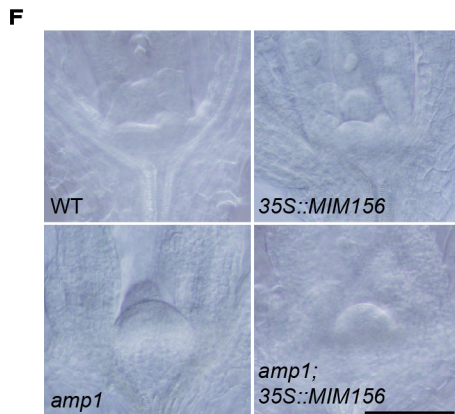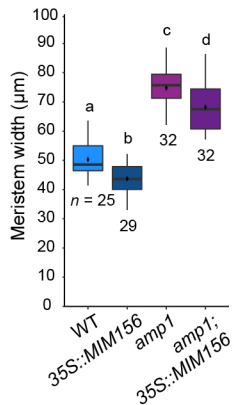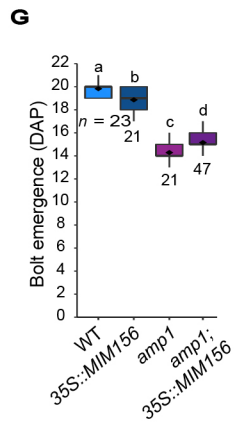

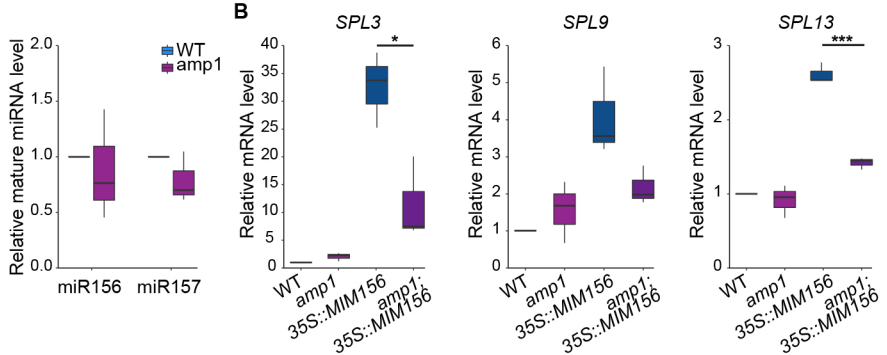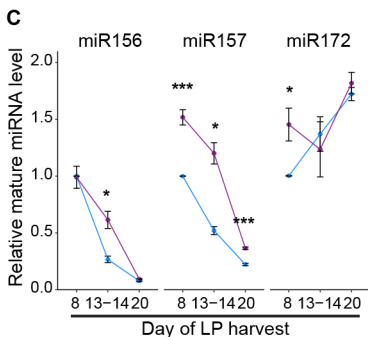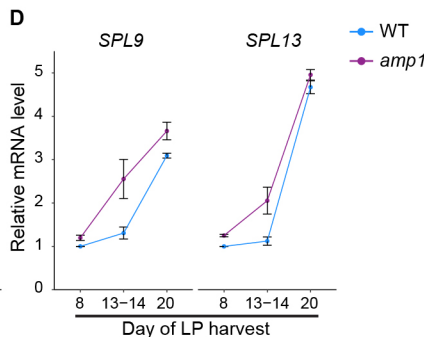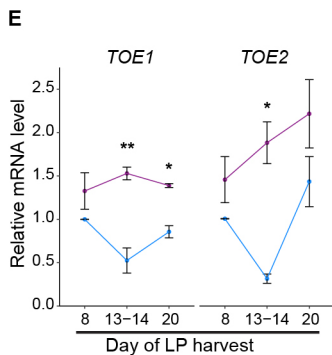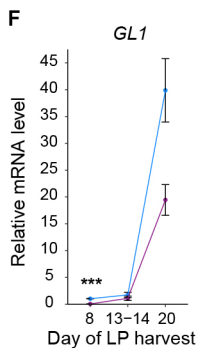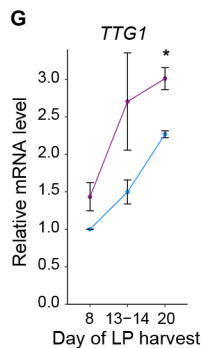



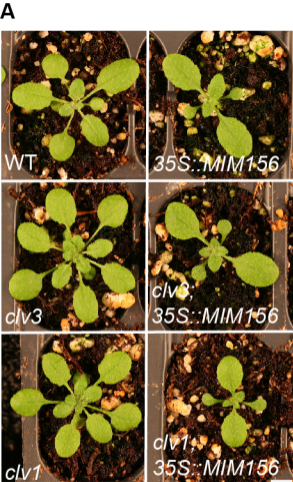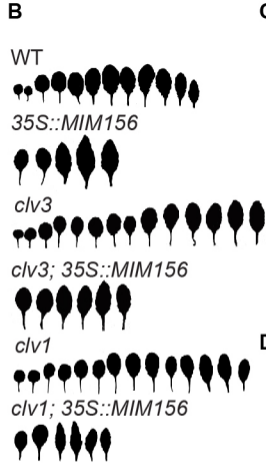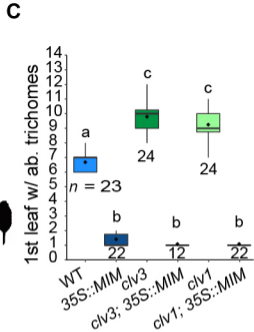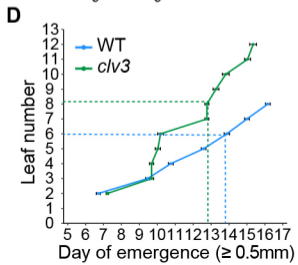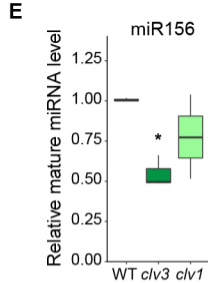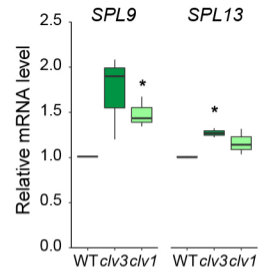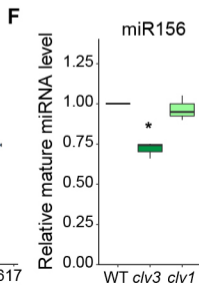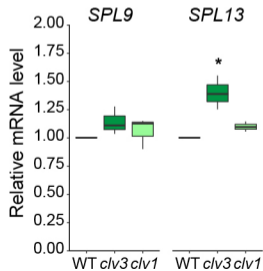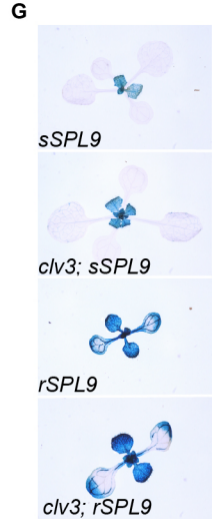

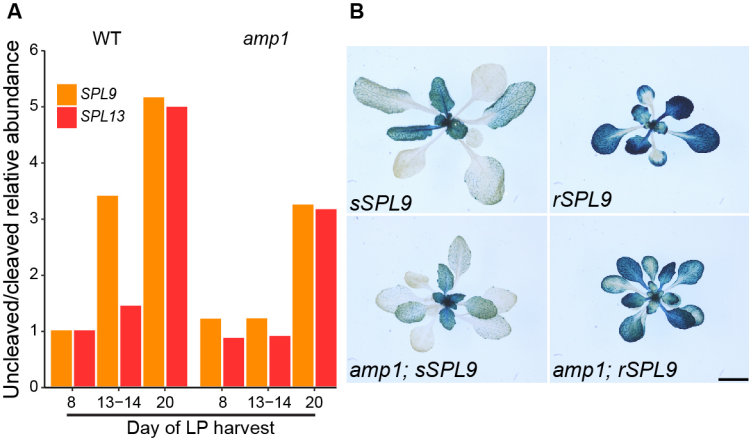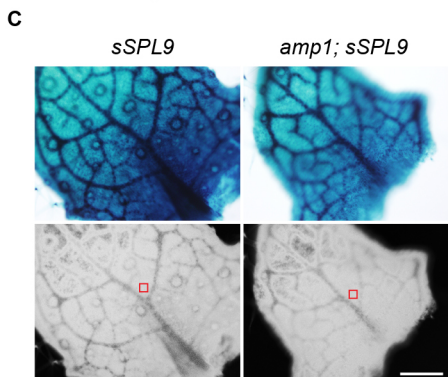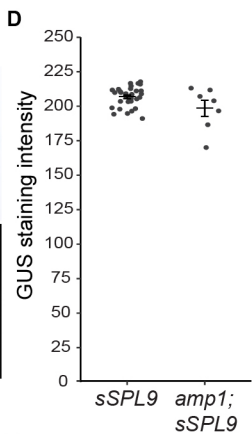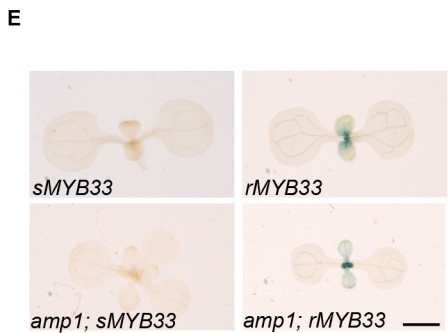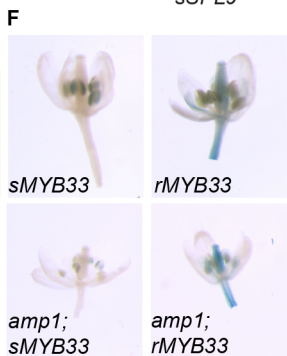

Source: https://www.biorxiv.org/content/10.1101/856864v1.full.pdf
